# Supplementary material for: Enhancing the mechanical and thermal properties of boron nitride nanoplatelets/elastomer nanocomposites by latex mixing
Source: Royal Society of Chemistry journal article supplement (doi:10.1039/c6ra11356g), 2016-01-01
Supplement: c6ra11356g1.pdf [file c6ra11356g1.pdf]

## Supporting Information

### Enhancing the mechanical and thermal properties of boron nitride nanoplatelets/elastomer nanocomposites by latex mixing

*O-Seok Kwon<sup>†</sup>, Dongju Lee<sup>†</sup>, Seong Pil Lee, Yong Gu Kang\*, Nam Chul Kim\*, Sung Ho Song\**

<sup>†</sup>These authors contributed equally to this work.

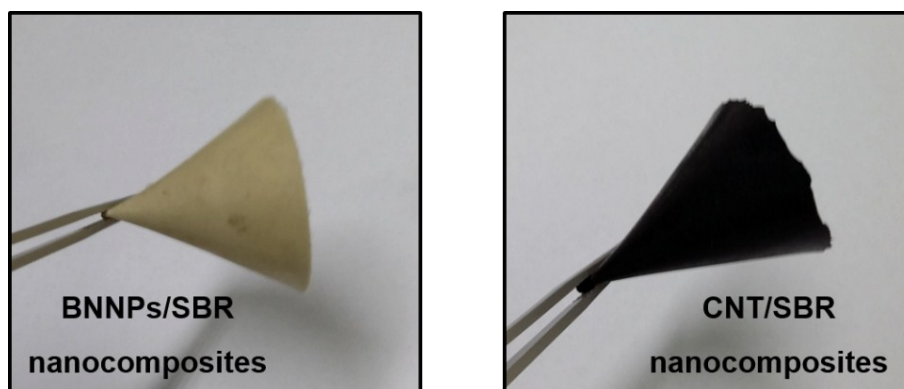

**Figure S1.** Digital image of BNNPs nanocomposites and CNT nanocomposites.

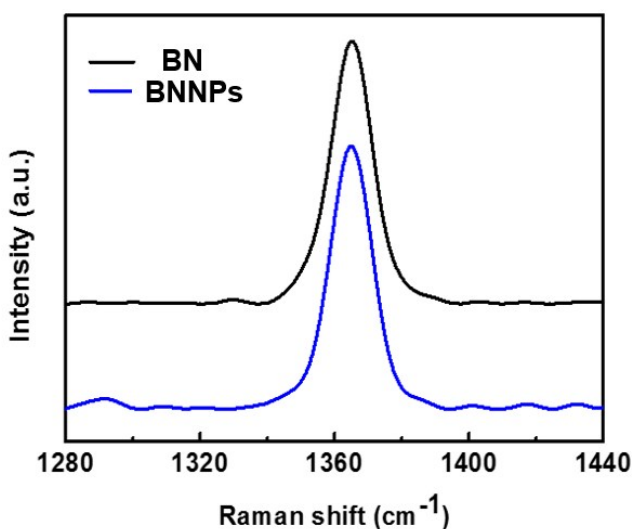

**Figure S2.** Raman spectroscopy of BN and BNNPs.

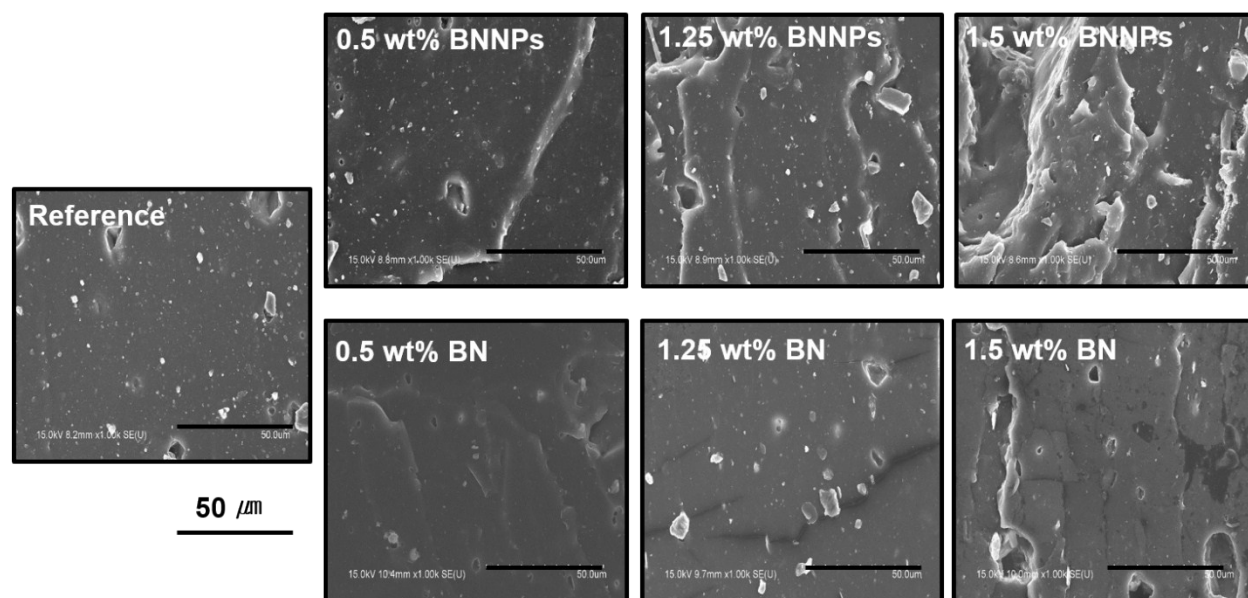

**Figure S3.** SEM image of fractures of BN and BNNPs nanocomposites with different contents.

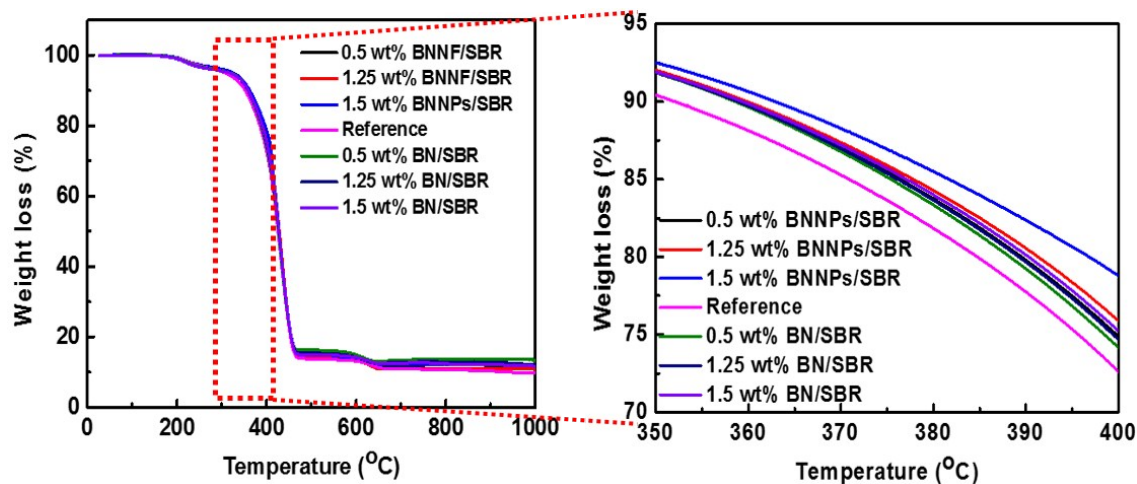

**Figure S4.** TGA of BN and BNNPs nanocomposites with different contents.

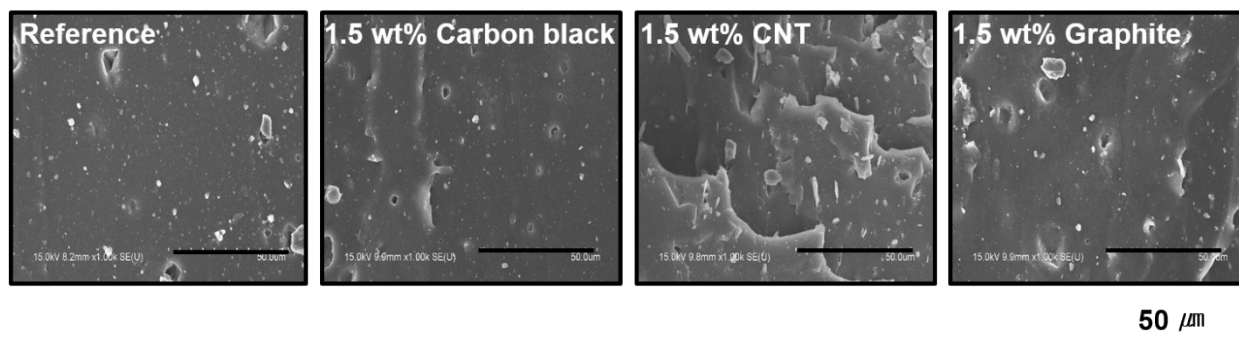

**Figure S5.** SEM images of the fracture surfaces of elastomer nanocomposites with different fillers.

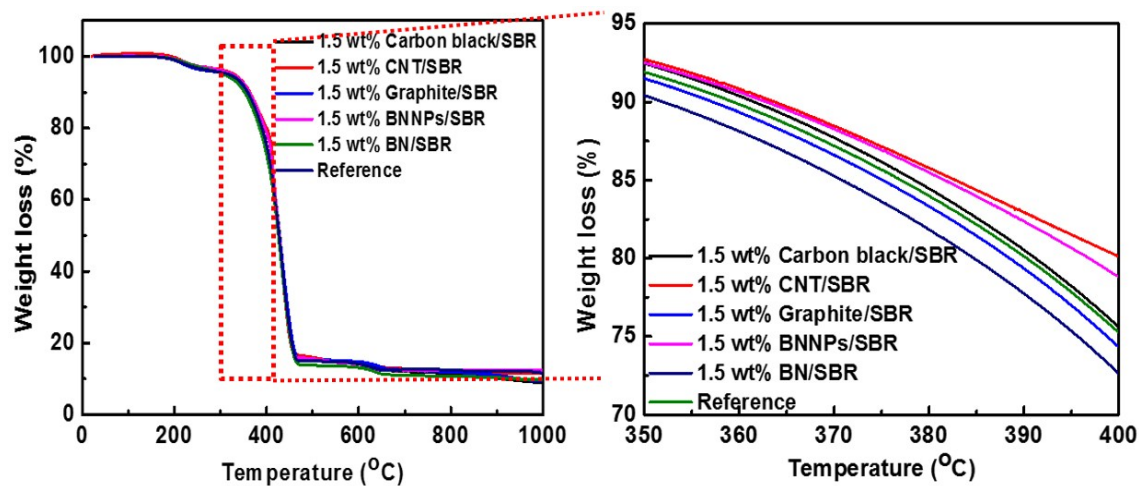

**Figure S6.** TGA of elastomer nanocomposites with different fillers.

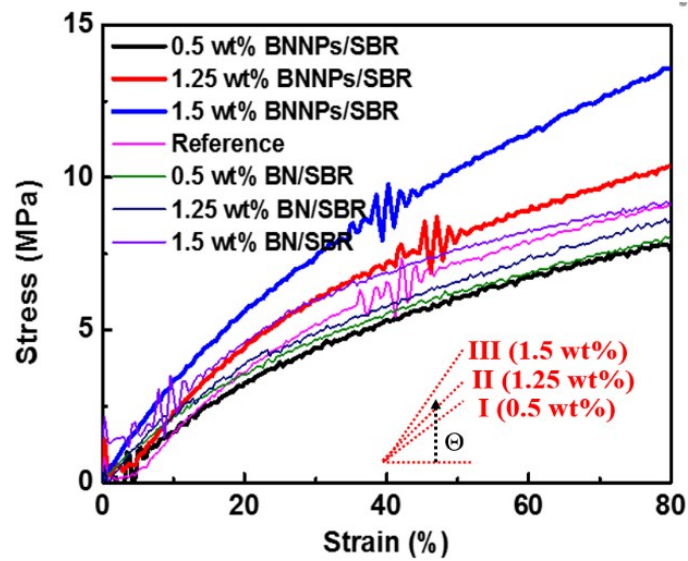

**Figure S7.** Elastic modulus of BN and BNNPs nanocomposites with different contents.

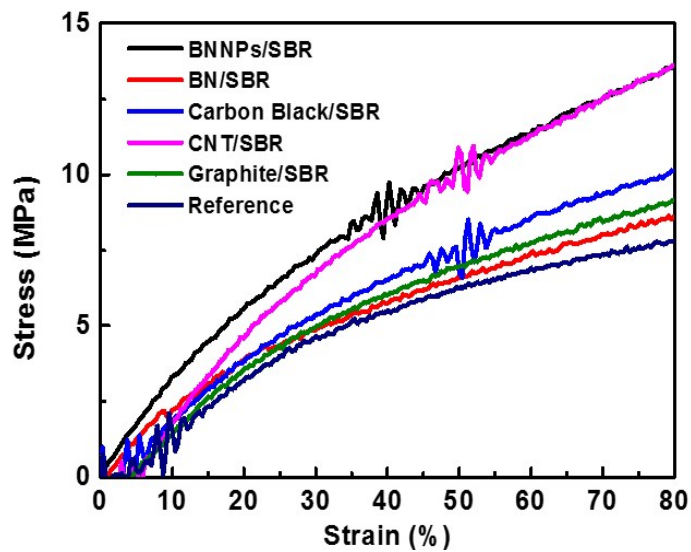

**Figure S8.** Elastic modulus of elastomer nanocomposites with different fillers.

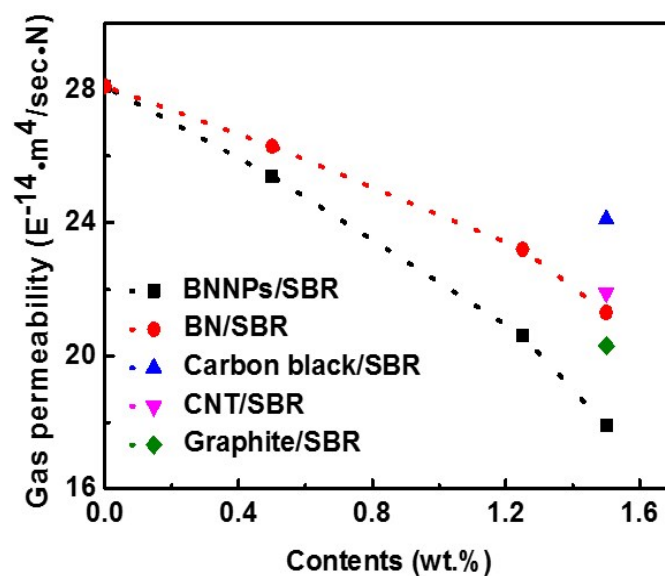

**Figure S9.** Gas permeability of elastomer nanocomposites with different fillers.

**Table S1.** Electrical properties of elastomer nanocomposites.

|                                    | Reference | BN<br>(0.5-1.5 wt%) | BNNPs<br>(0.5-1.5wt%) | CB  | Graphite | CNT |
|------------------------------------|-----------|---------------------|-----------------------|-----|----------|-----|
| Electrical<br>Conductivity<br>(kΩ) | 970       | > 1,000             | > 1,000               | 430 | 241      | 33  |

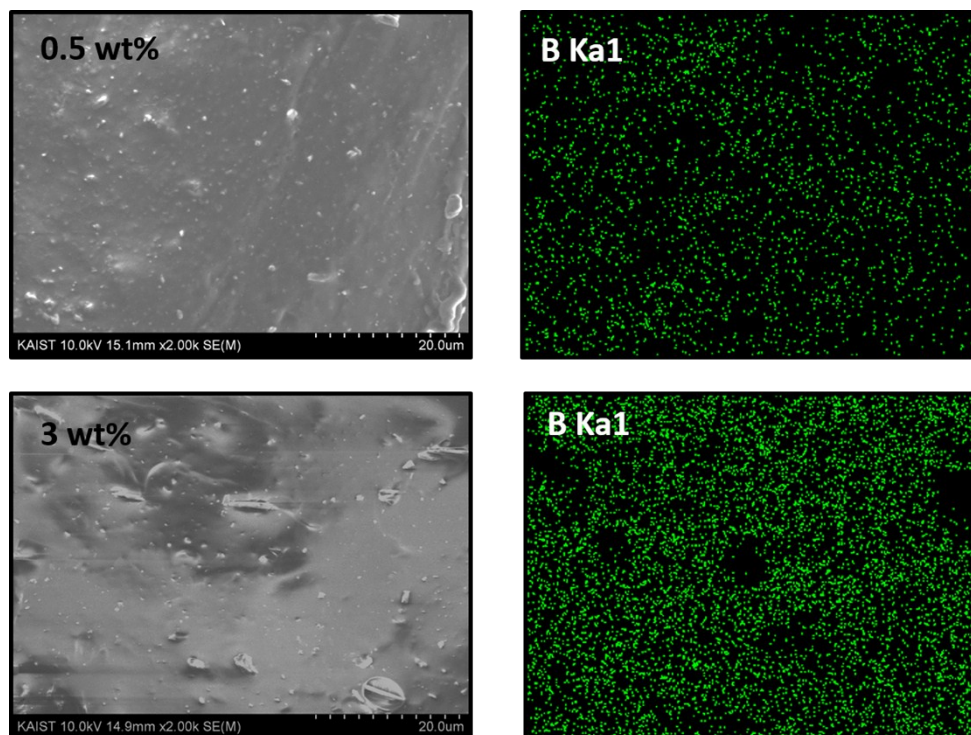

**Figure S10.** SEM images and EDS mapping of elastomer nanocomposites with different filler contents.
